# Supplementary material for: Anthropometric measurements can identify small for gestational age newborns: a cohort study in rural Tanzania
Source: Springer Nature journal article supplement (doi:10.1186/s12887-019-1500-0), 2019-04-23
Supplement: MOESM1 [file 16669868]

**Supplementary Table 1.** Differences in foot length, chest circumference and mid-upper-arm-circumference (MUAC) among the sexes.

|       | Foot length (cm) |         | Chest circumference (cm) |         | MUAC (cm)      |         |
|-------|------------------|---------|--------------------------|---------|----------------|---------|
|       | Mean $\pm$ SD    | p-value | Mean $\pm$ SD            | p-value | Mean $\pm$ SD  | p-value |
| Boys  | 7.9 $\pm$ 0.5    | 0.0139  | 32.6 $\pm$ 2.1           | 0.1781  | 10.6 $\pm$ 1.0 | 0.2159  |
| Girls | 7.8 $\pm$ 0.4    |         | 32.3 $\pm$ 2.1           |         | 10.4 $\pm$ 1.1 |         |
