# Supplementary material for: Anthropometric measurements can identify small for gestational age newborns: a cohort study in rural Tanzania
Source: Springer Nature journal article supplement (doi:10.1186/s12887-019-1500-0), 2019-04-23

Supplementary Figure 1.

**ROC curves for SGA and all three anthropometric measurements  
- only including newborns with gestational age estimated within 14 weeks**

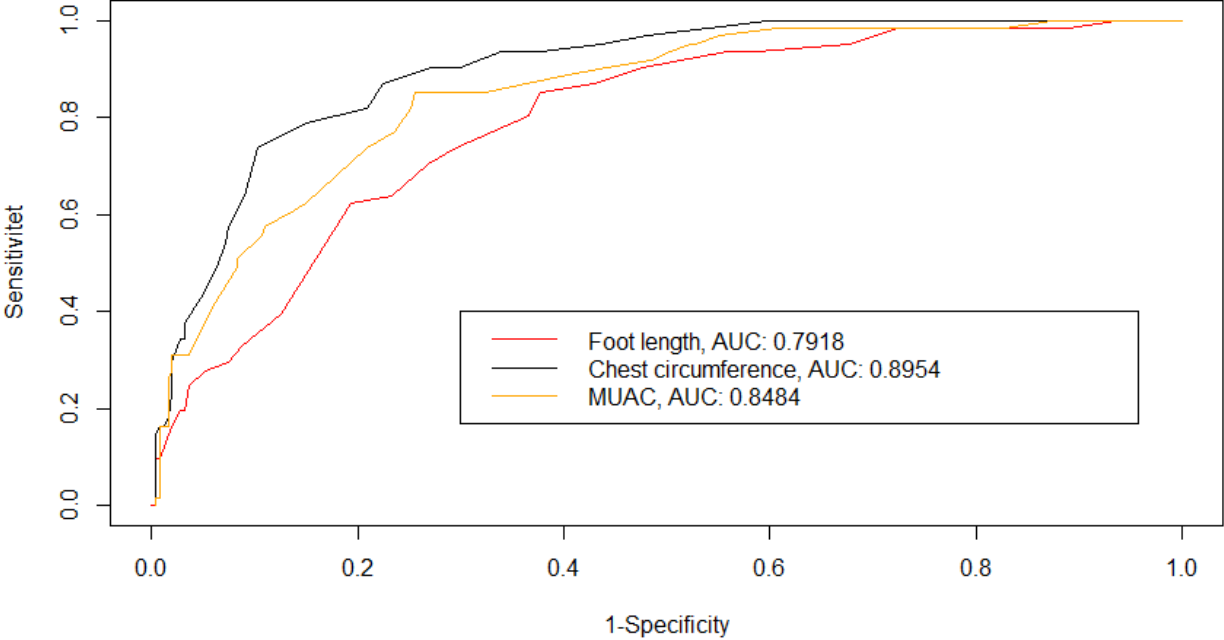

Supplement: MOESM2 [file 16669868]
