# Supplementary material for: Anthropometric measurements can identify small for gestational age newborns: a cohort study in rural Tanzania
Source: Springer Nature journal article supplement (doi:10.1186/s12887-019-1500-0), 2019-04-23

Supplementary Figure 3.

ROC curves for SGA and all three anthropometric measurements - only including girls

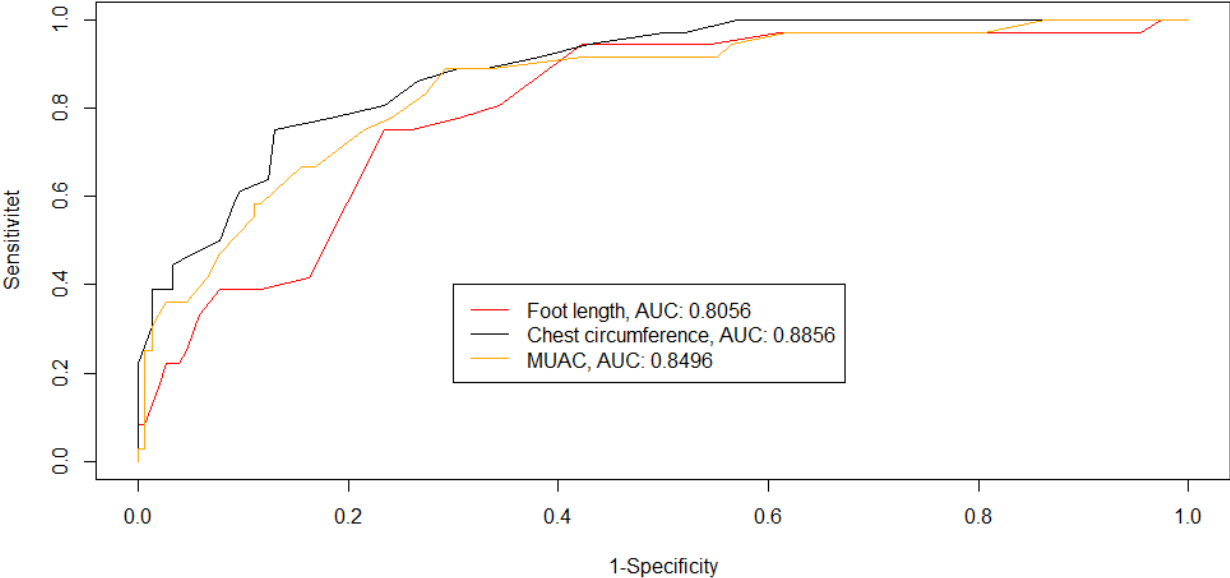

Supplement: MOESM4 [file 16669868]
