# Supplementary material for: Anthropometric measurements can identify small for gestational age newborns: a cohort study in rural Tanzania
Source: Springer Nature journal article supplement (doi:10.1186/s12887-019-1500-0), 2019-04-23
Supplement: MOESM5 [file 16669868]

**Supplementary Table 2.** Foot length cut-off identifying SGA<sup>1</sup> when stratified by sex together with the 95% confidence interval (CI).

|       | Cut-off (cm)           | Sensitivity (%)<br>(95% CI) | Specificity (%)<br>(95% CI) |
|-------|------------------------|-----------------------------|-----------------------------|
| Boys  | Foot length $\leq 7.7$ | 66 (47 – 81)                | 72 (64 – 79)                |
| Girls | Foot length $\leq 7.6$ | 75 (58 – 88)                | 74 (66 – 81)                |

<sup>1</sup> SGA = Small for gestational age
